# Supplementary material for: Evolutionary and cellular analysis of the ‘dark’ pseudokinase PSKH2
Source: Oxford University Press journal article supplement (doi:10.1042/bcj20220474), 2022-12-15
Supplement: bcj-2022-0474_supp.pdf [file bcj-2022-0474_supp.pdf]

**A**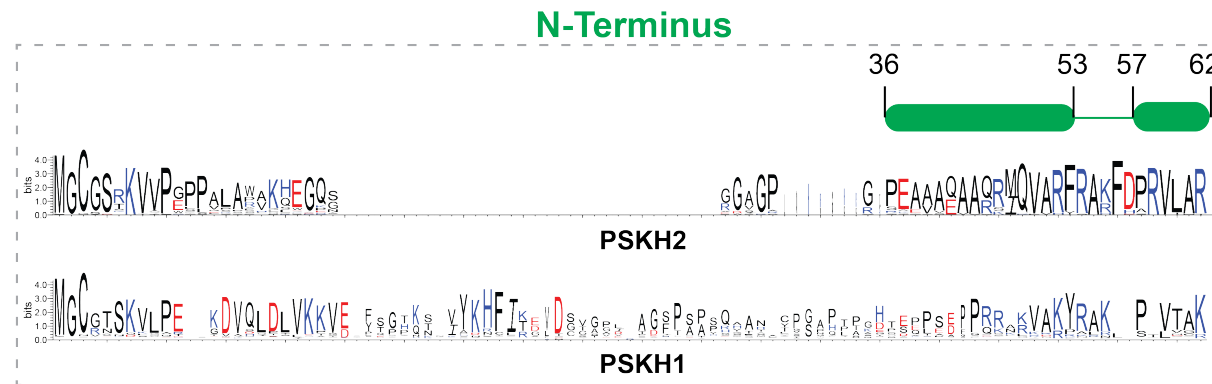**B**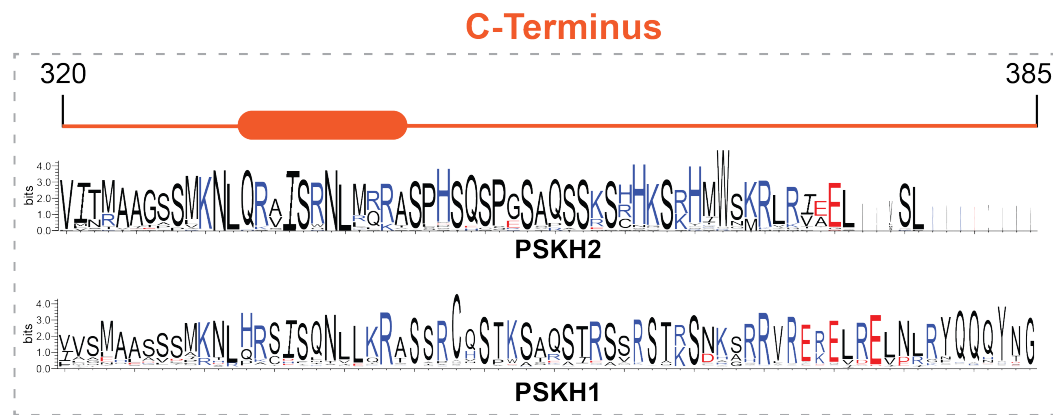**C**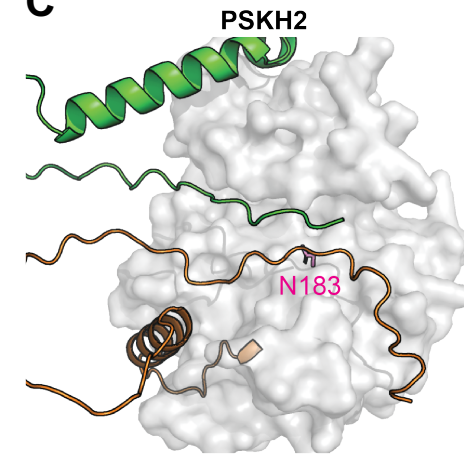**D**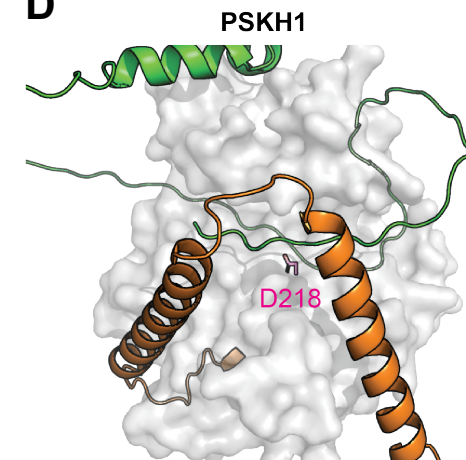

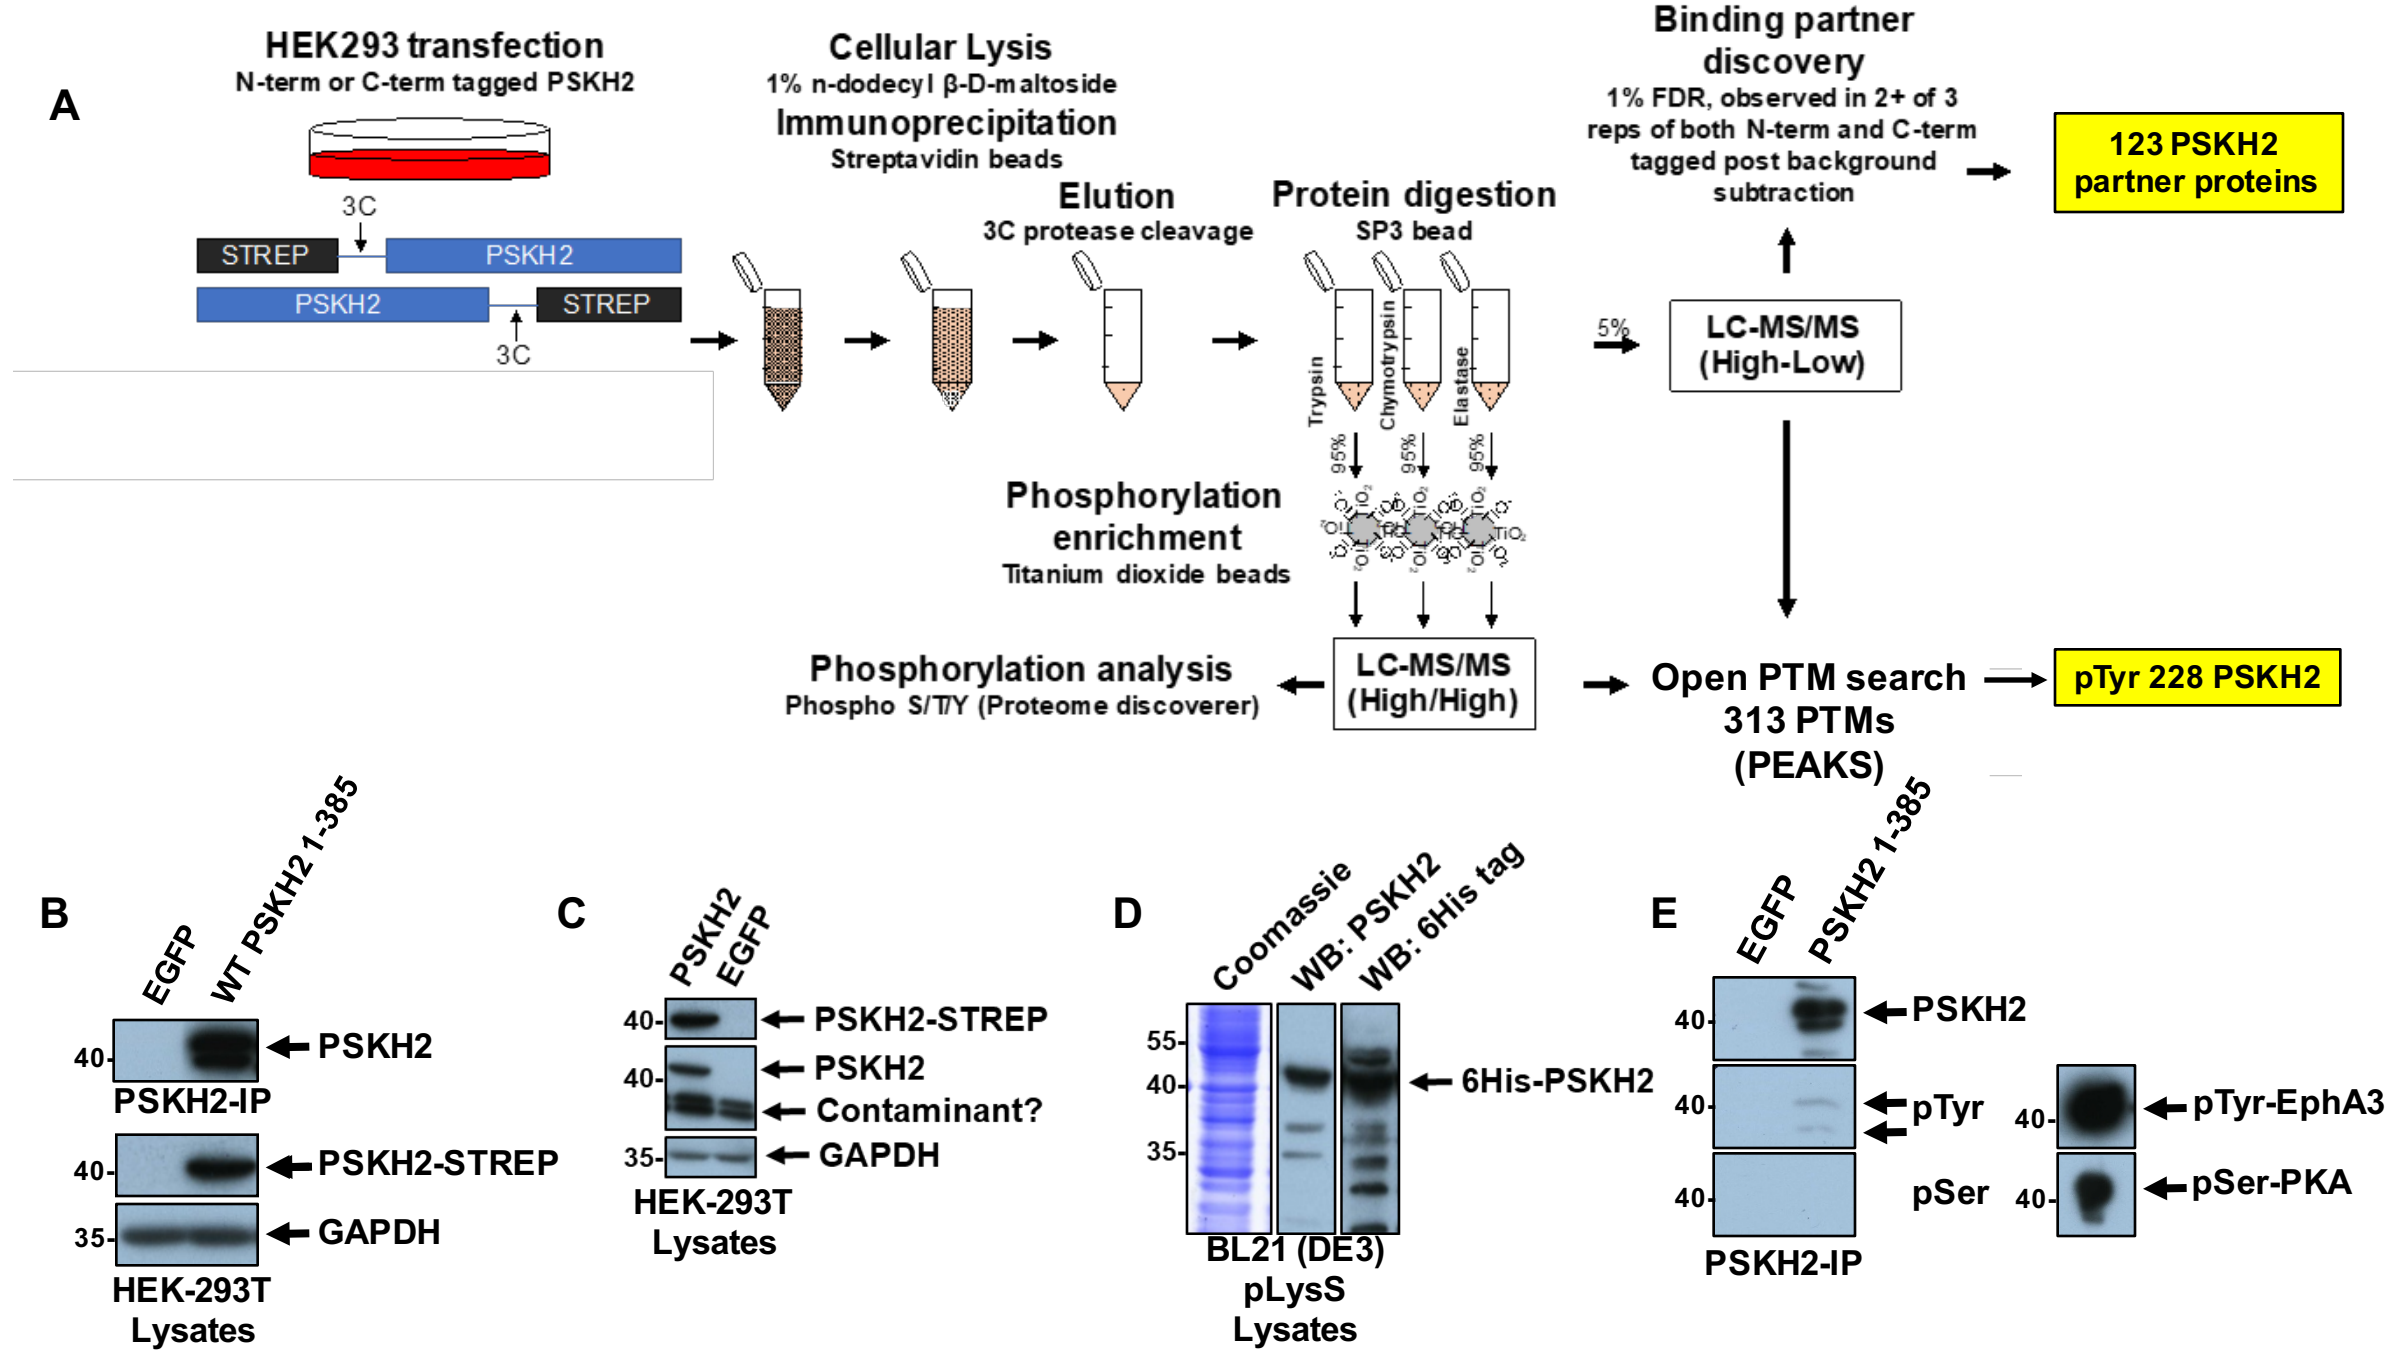

Supplementary Figure 2

**A**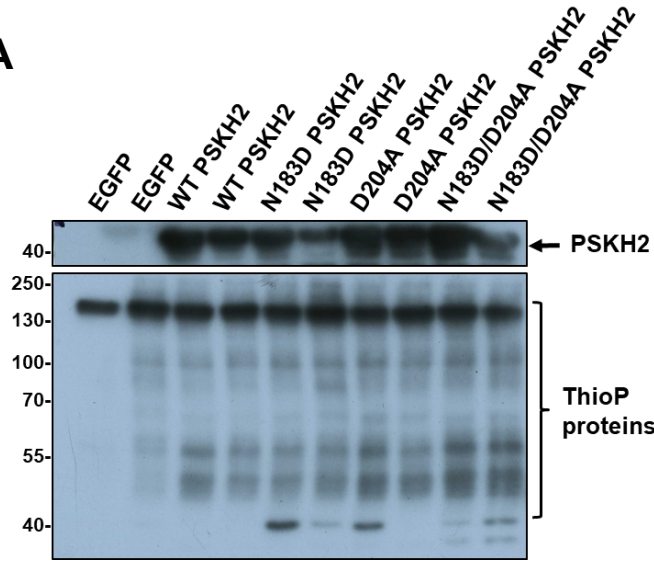**B**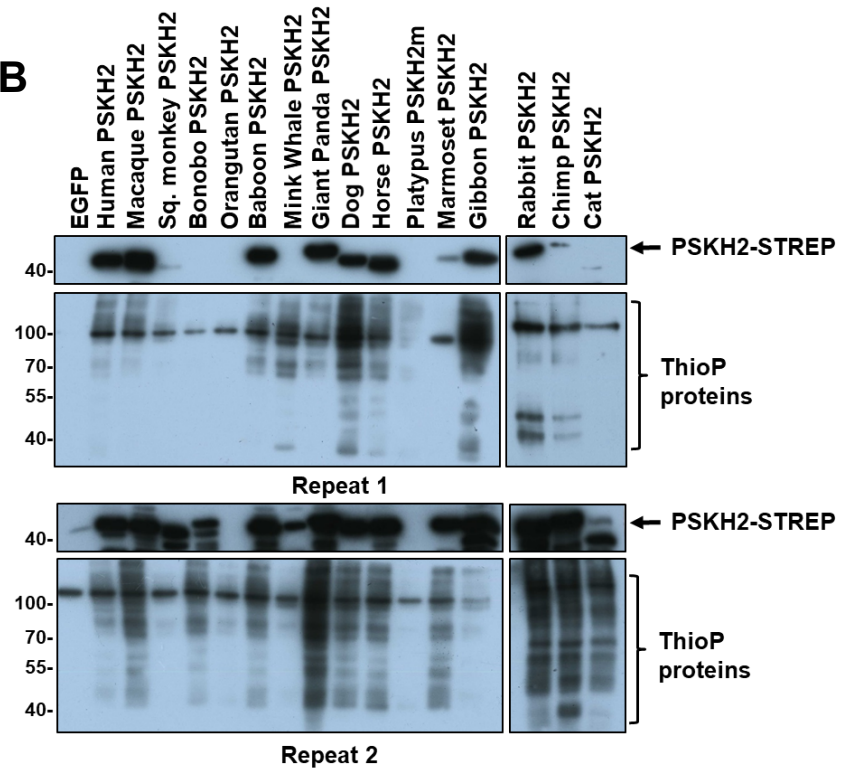**C**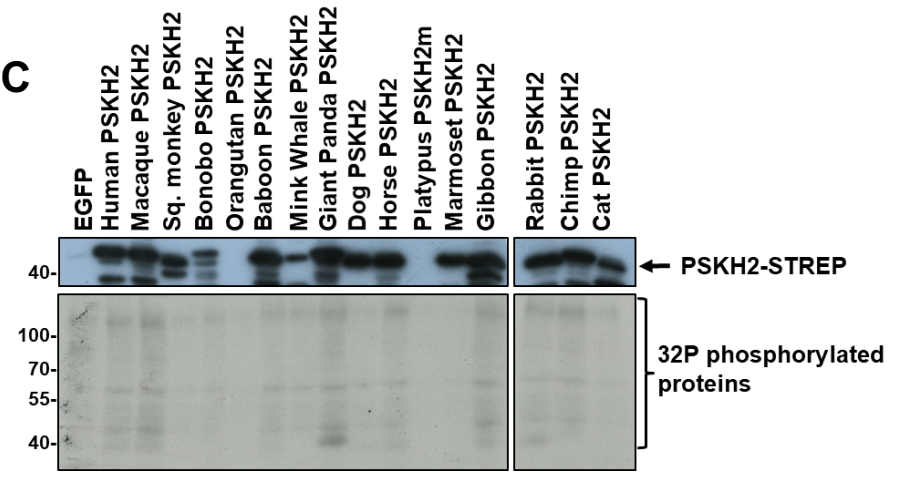

Supplementary Figure 3

**A**

Observed in both replicates of CT-tagged PSKH2

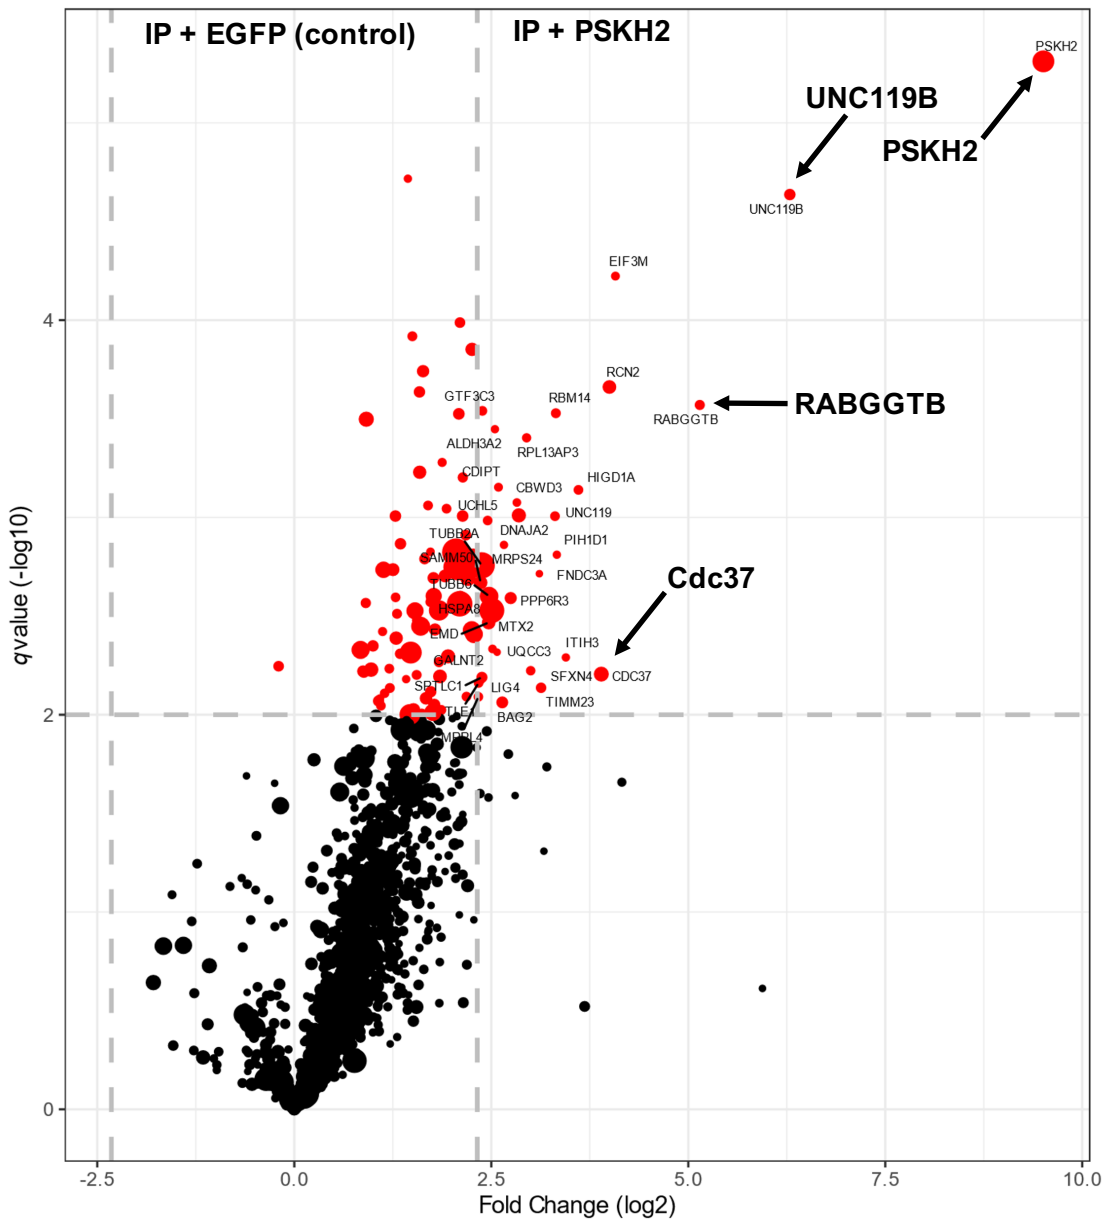**B**

Observed in at-least 2 of 3 replicates employing NT-tagged PSKH2

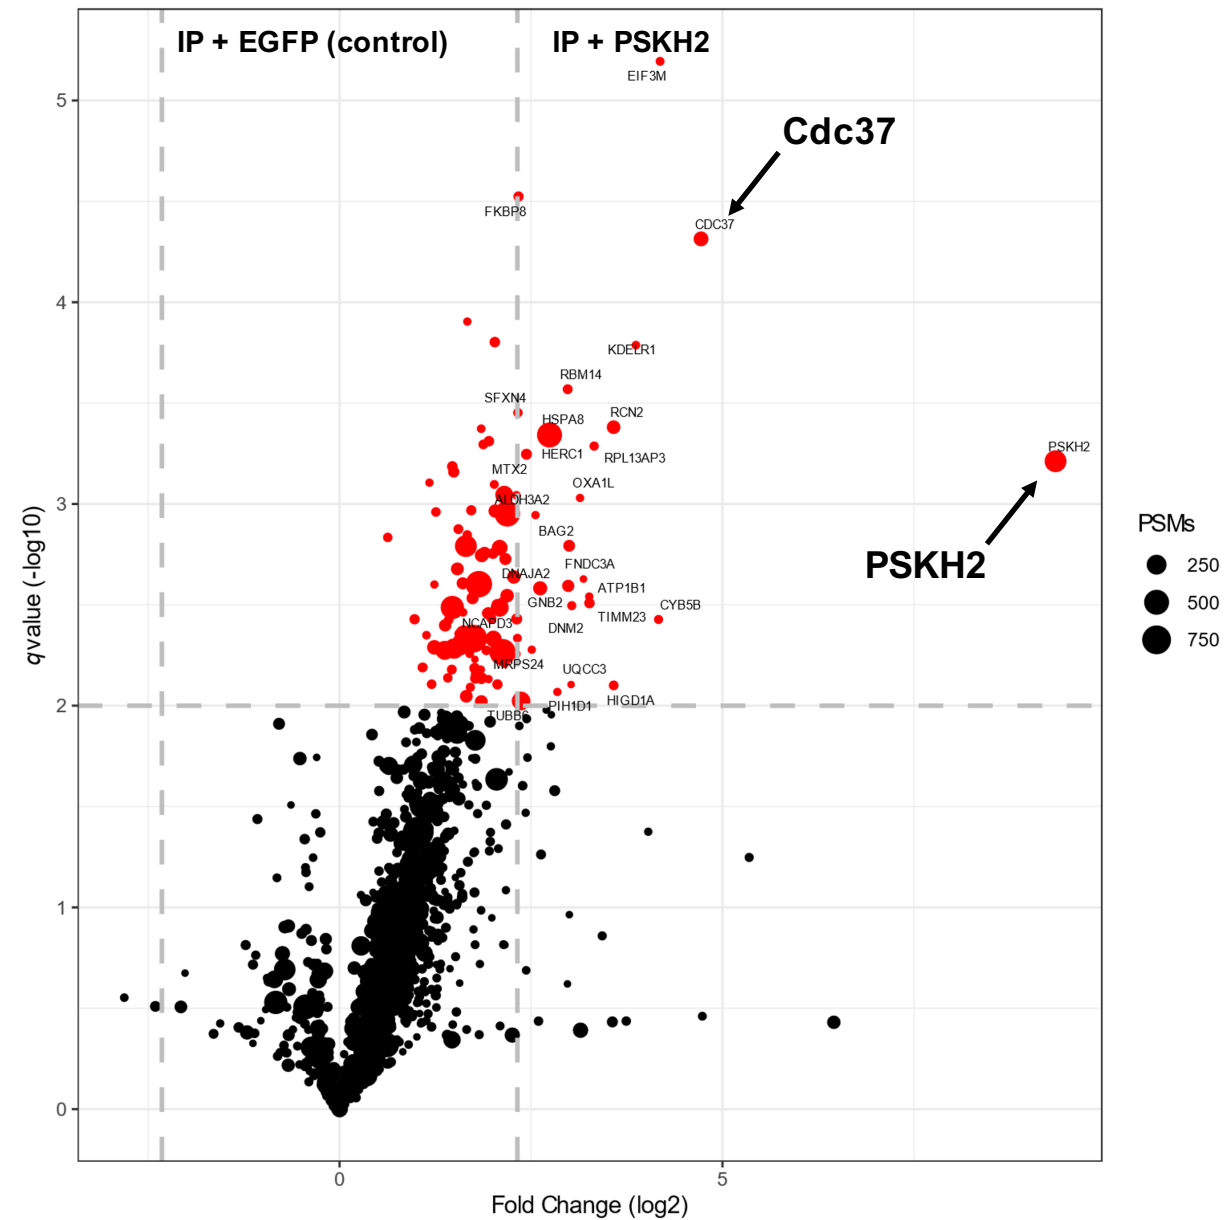**Supplementary Figure 4**





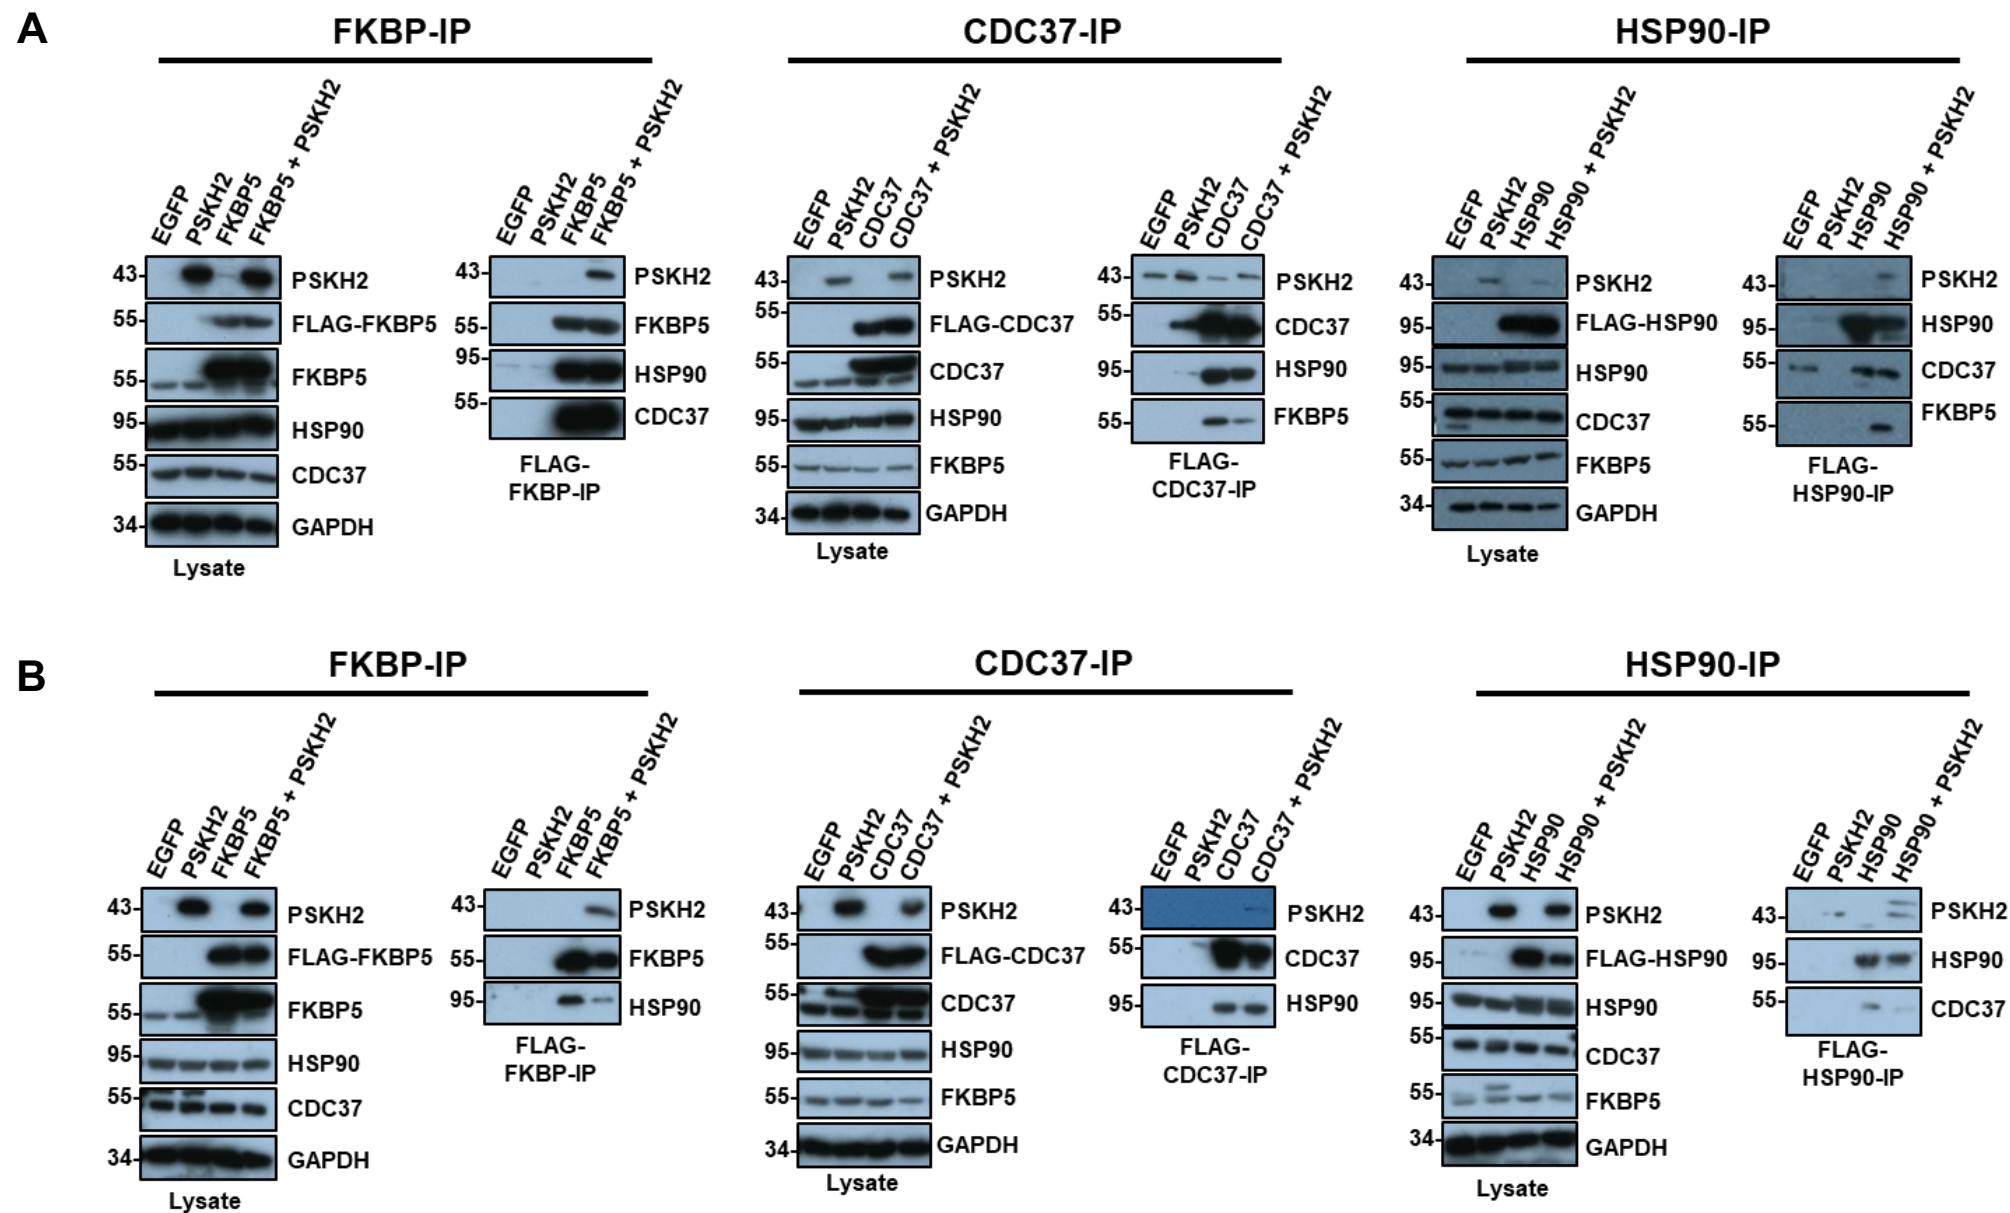

Supplementary Figure 6

**A**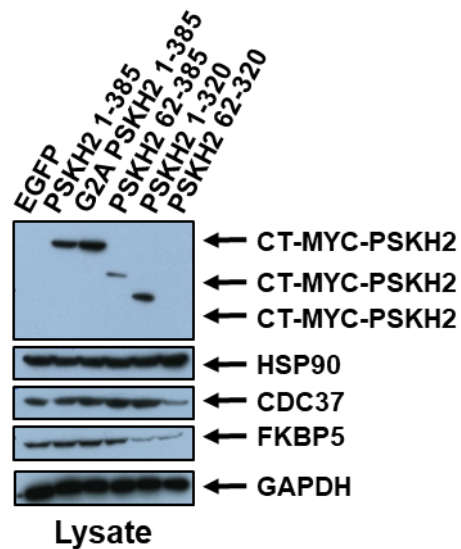**B**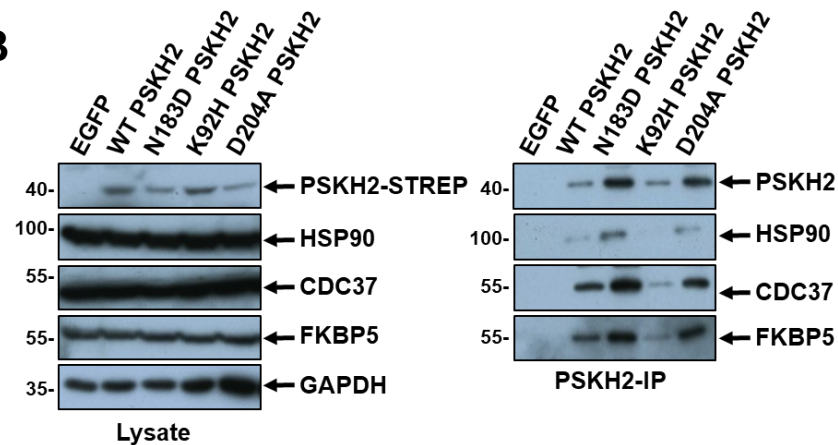**C**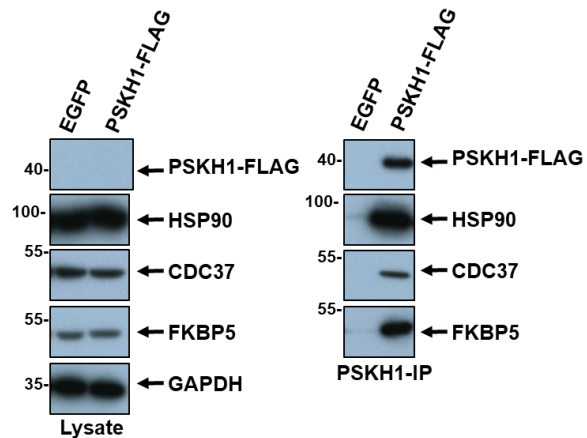**D**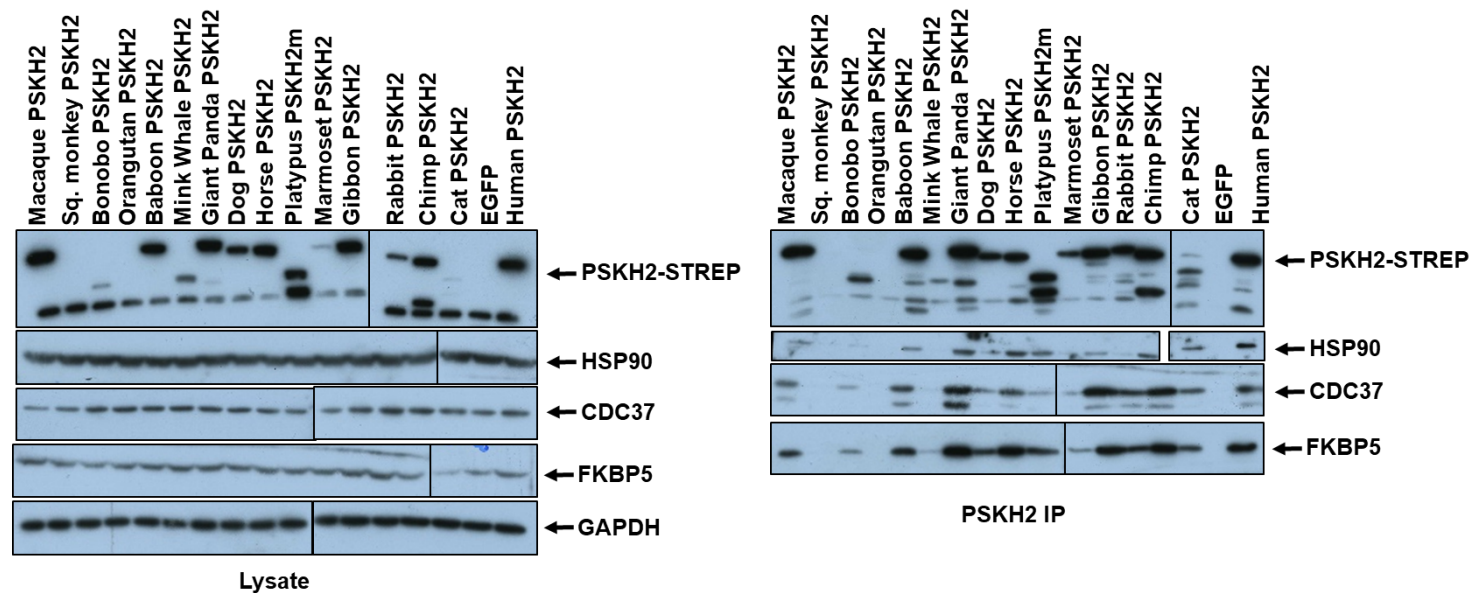

**A**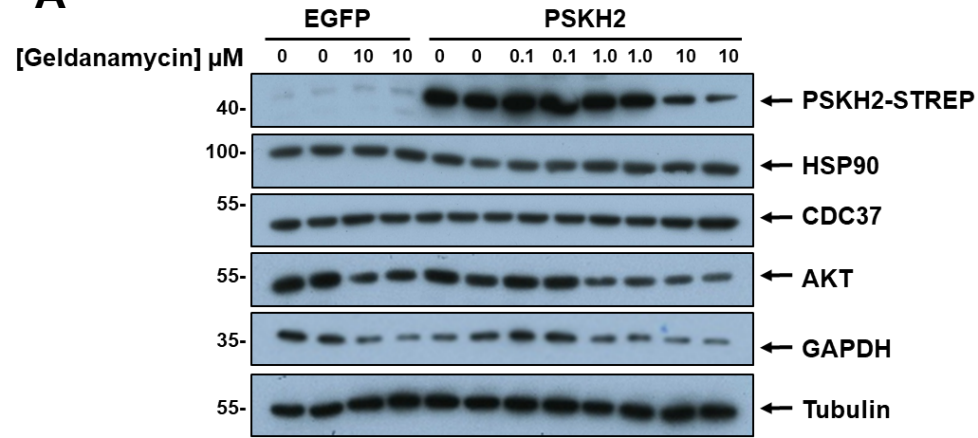**B**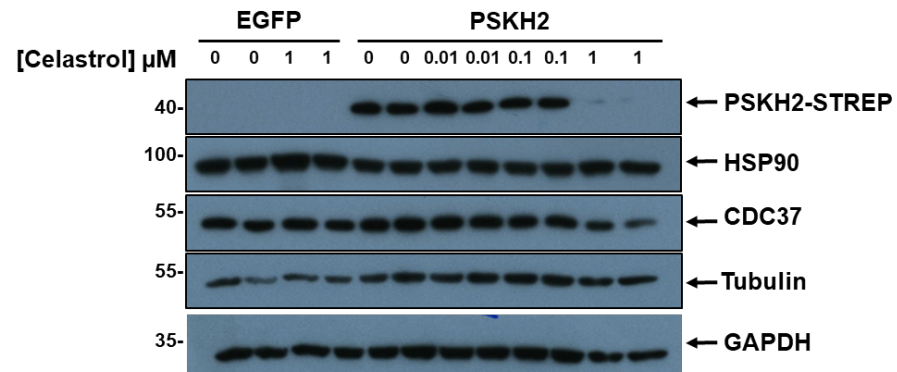**C**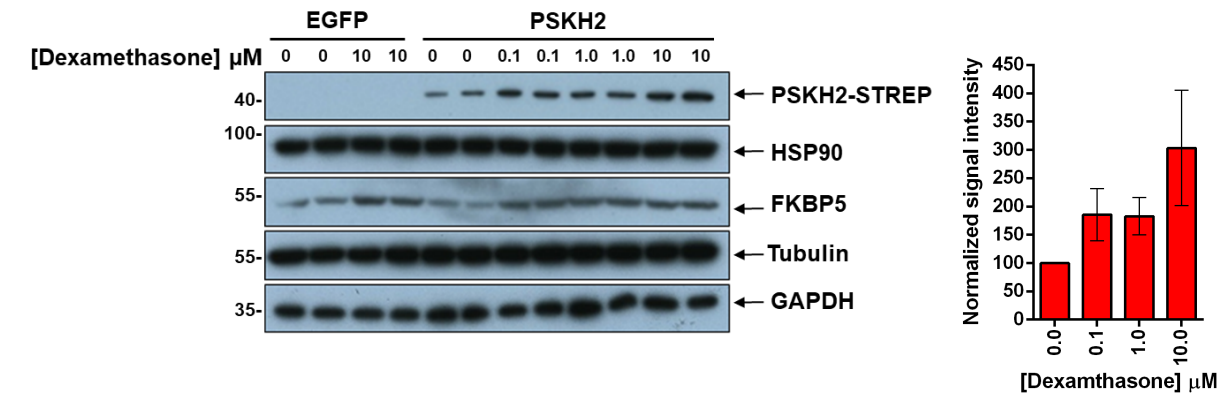**D**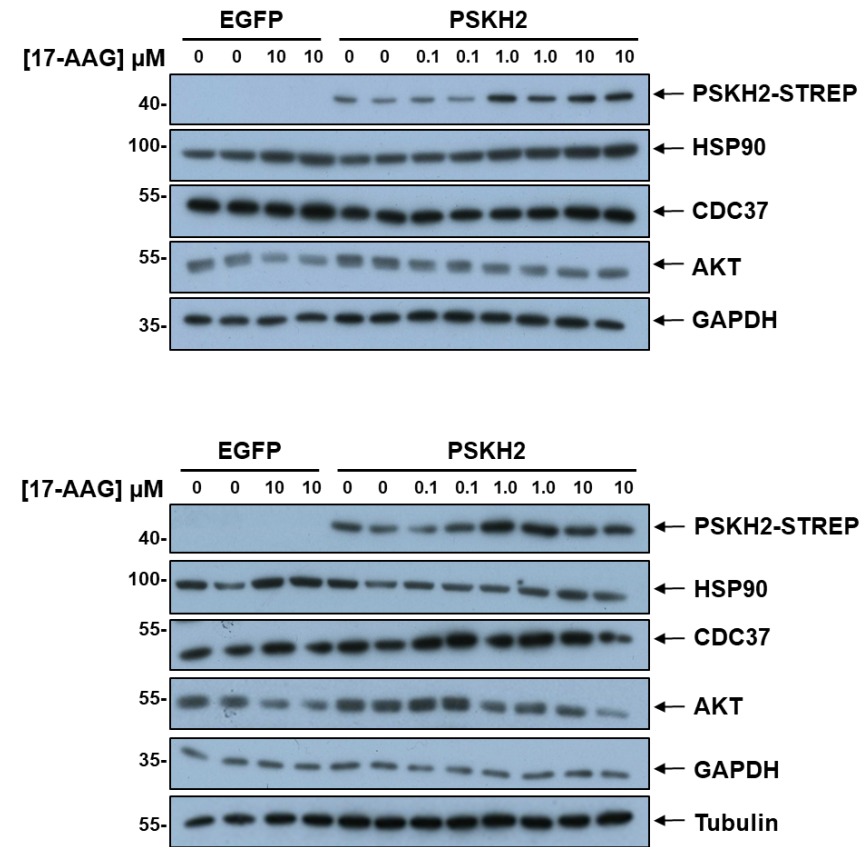



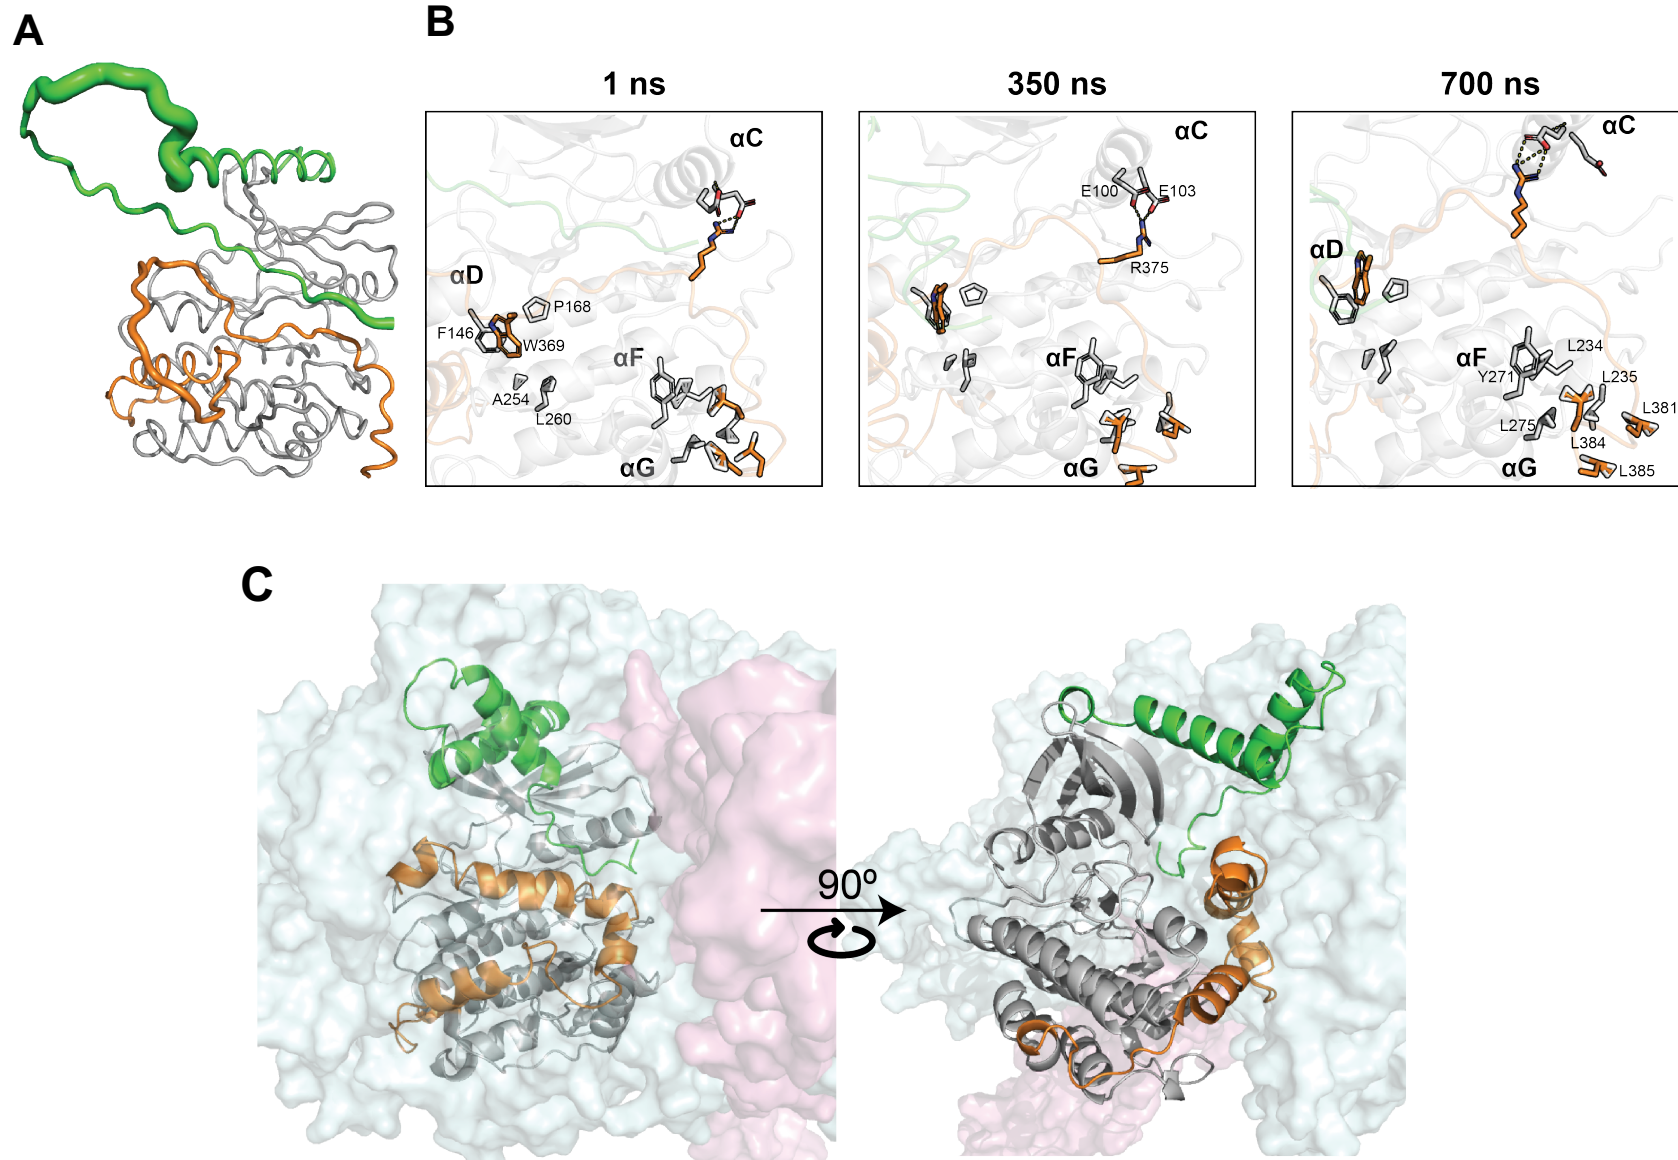

Supplementary Figure 9

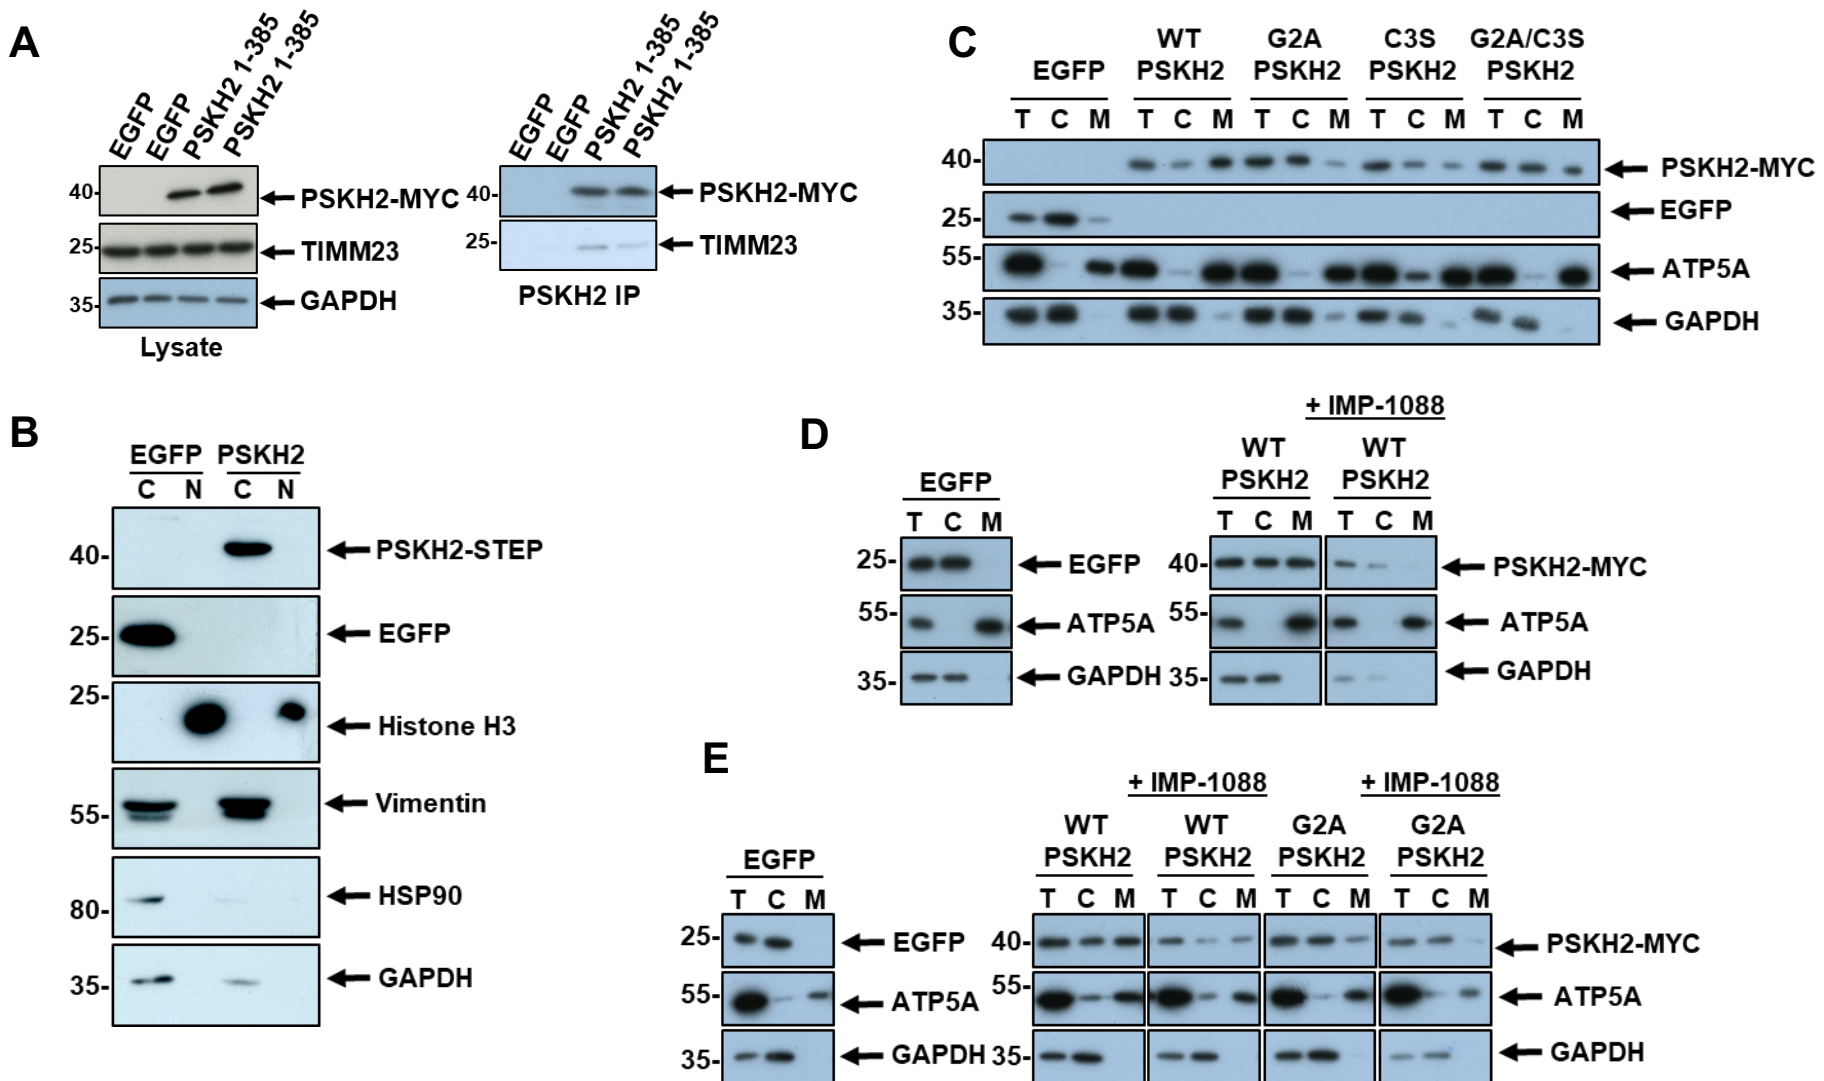

Supplementary Figure 10



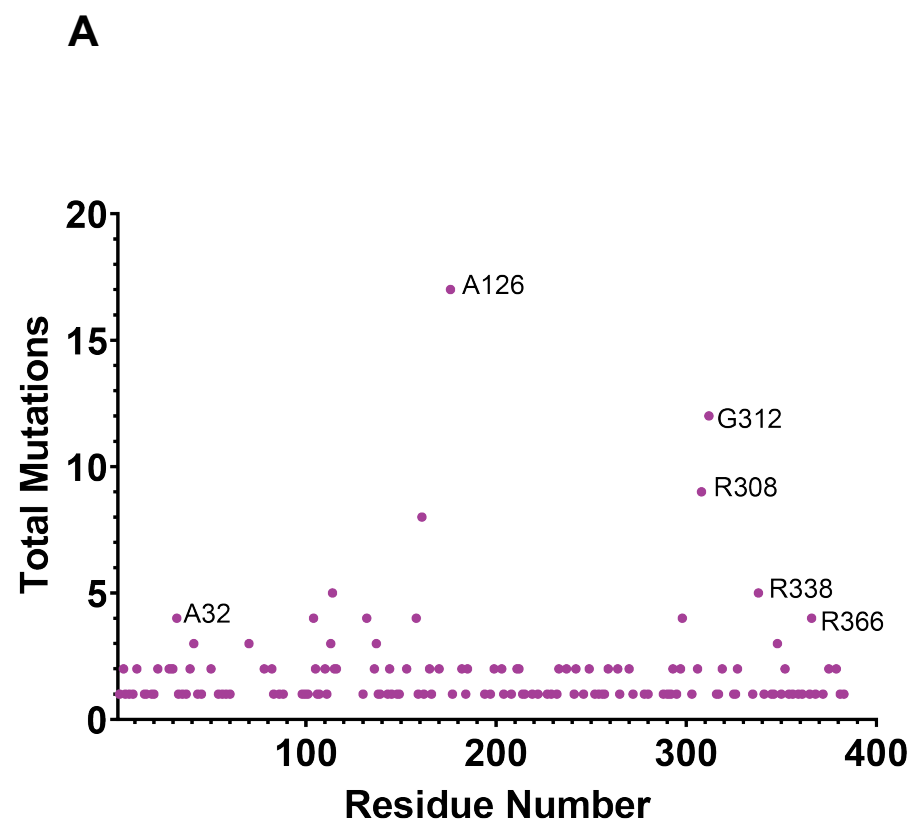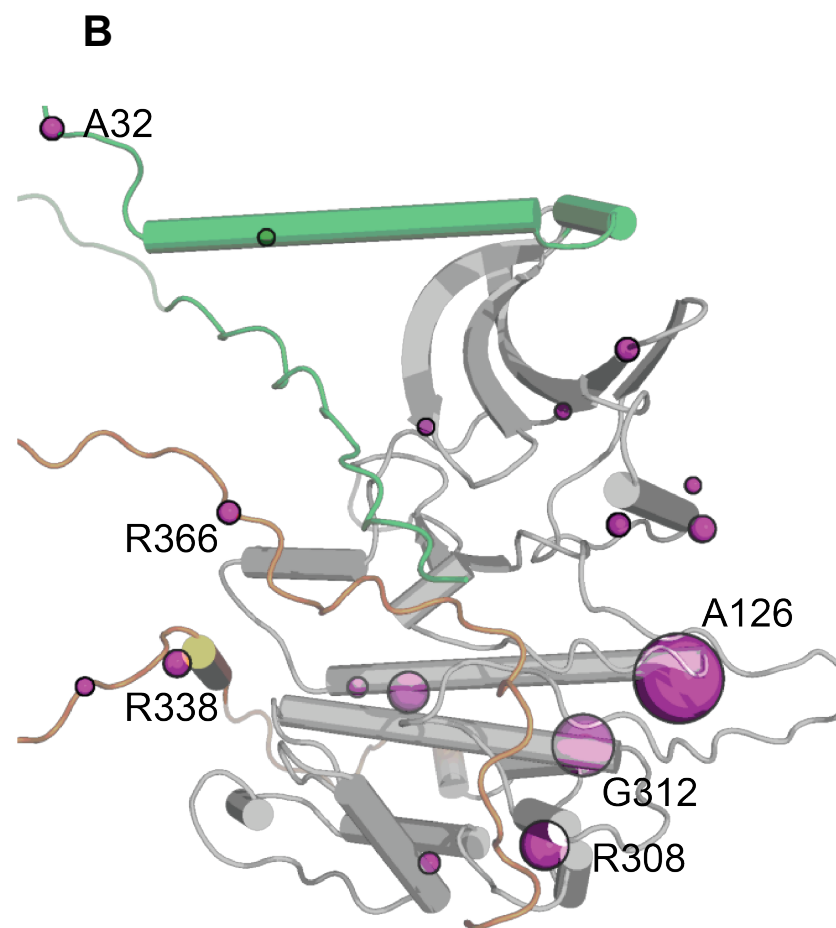

Supplementary Figure 11
